# Supplementary material for: Allele-specific binding of RNA-binding proteins reveals functional genetic variants in the RNA
Source: PubMed Central journal article supplement (PMC6430814; doi:10.1038/s41467-019-09292-w), 2019-03-22
Supplement: 41467_2019_9292_MOESM3_ESM.pdf [file 41467_2019_9292_MOESM3_ESM.pdf]

## **Description of Additional Supplementary Files**

File Name: Supplementary Data 1

Description: Primer sequences used in this study

File Name: Supplementary Data 2

Description: ASB events identified in HepG2 and K562 cells.
